# Supplementary material
Source: publisher site journal article supplement (https://www.dovepress.com/article/236818)

| 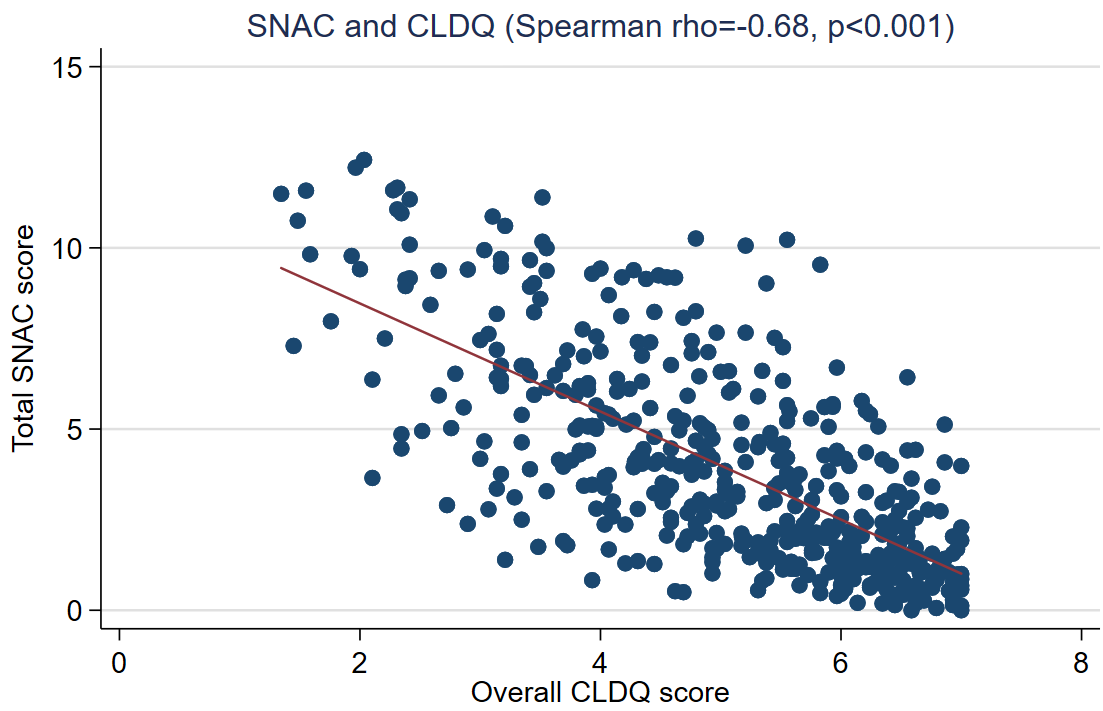 | 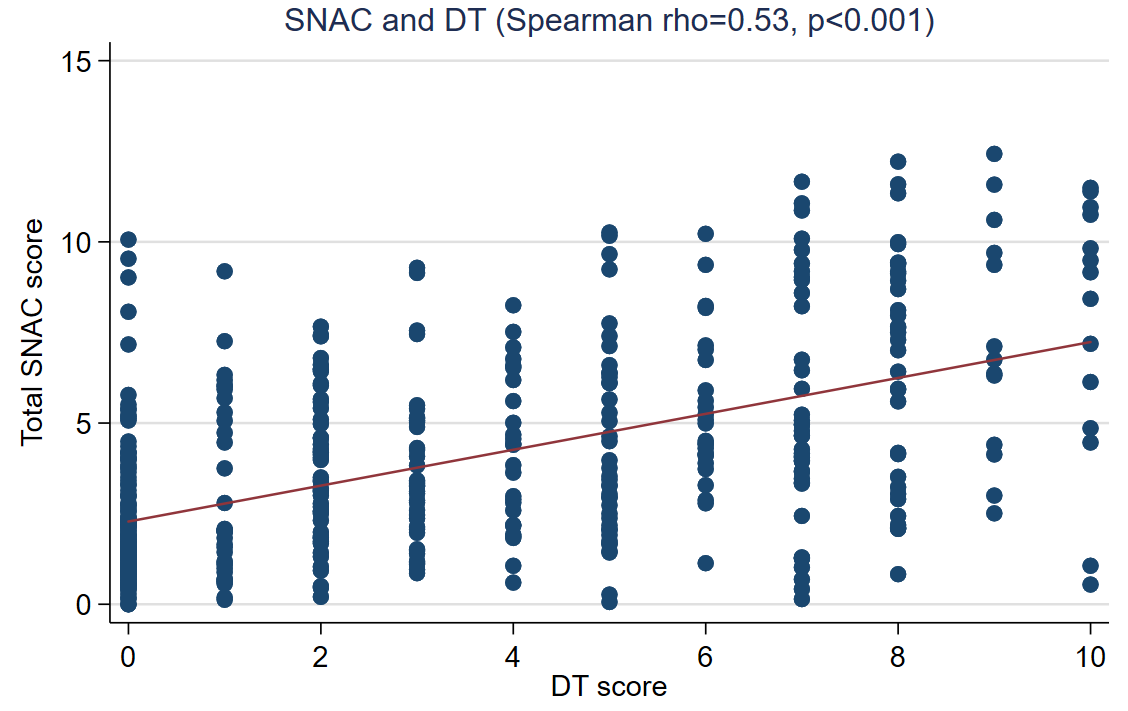 |
| --- | --- |
| 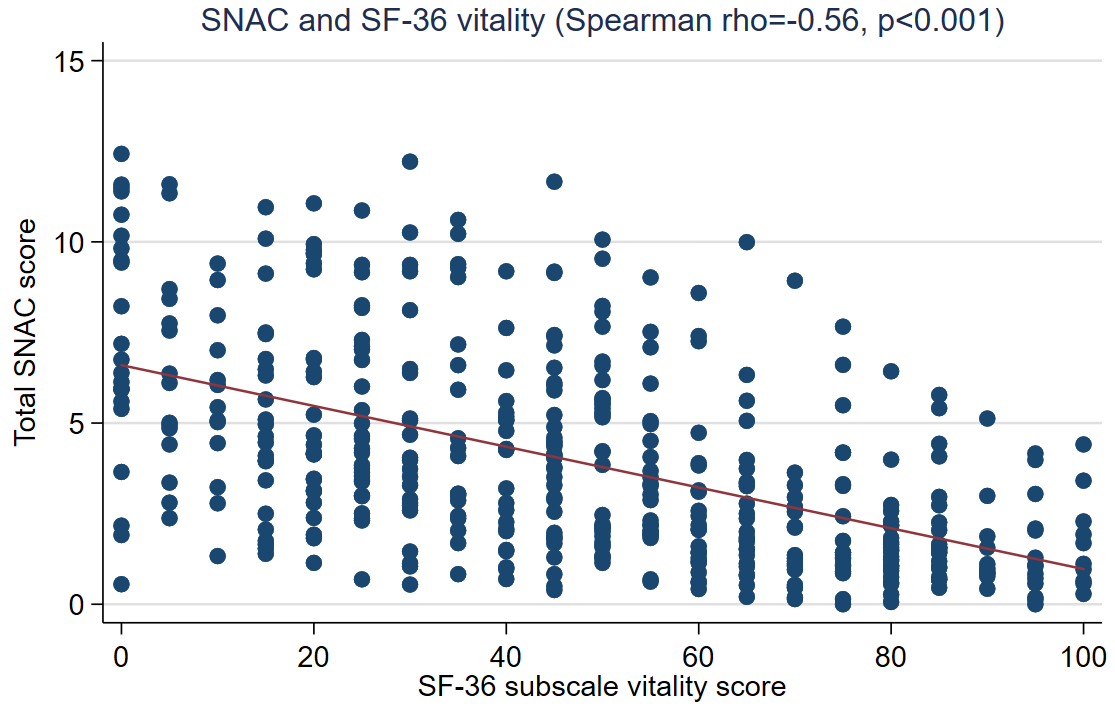 | 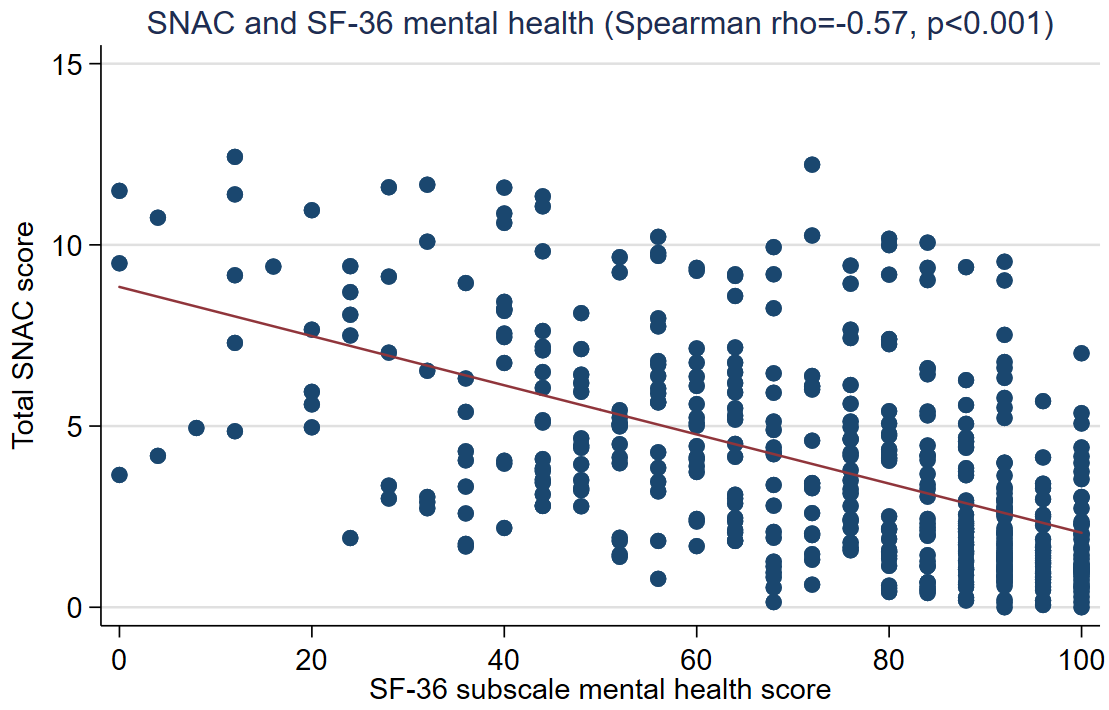 |
| 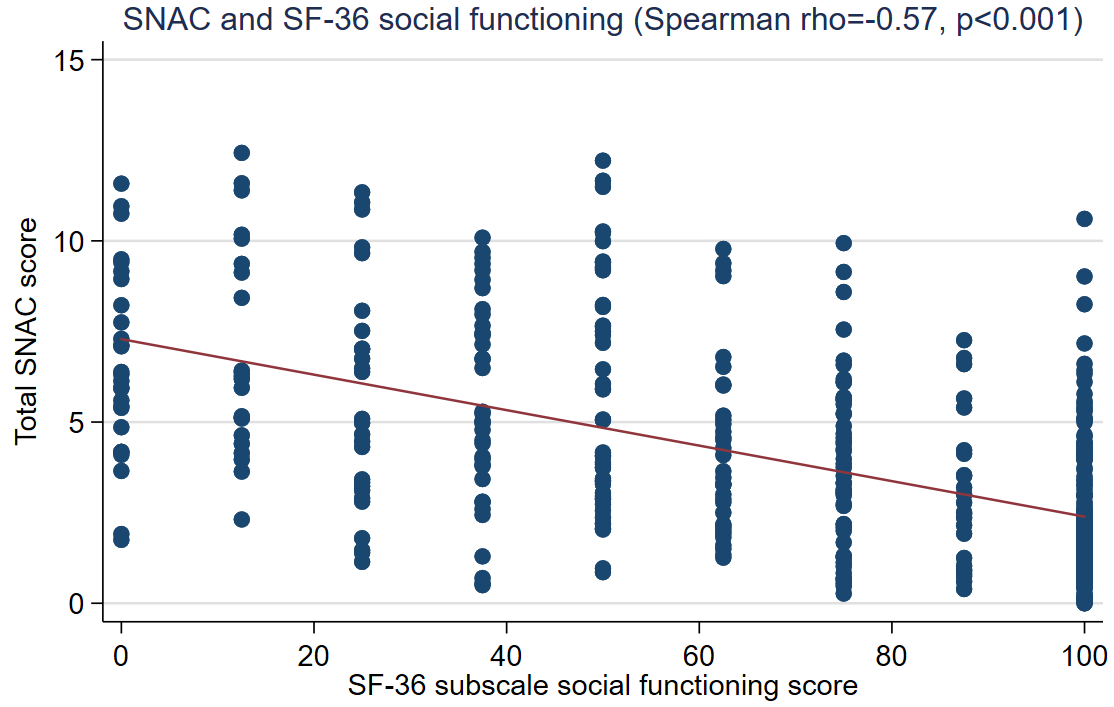 | 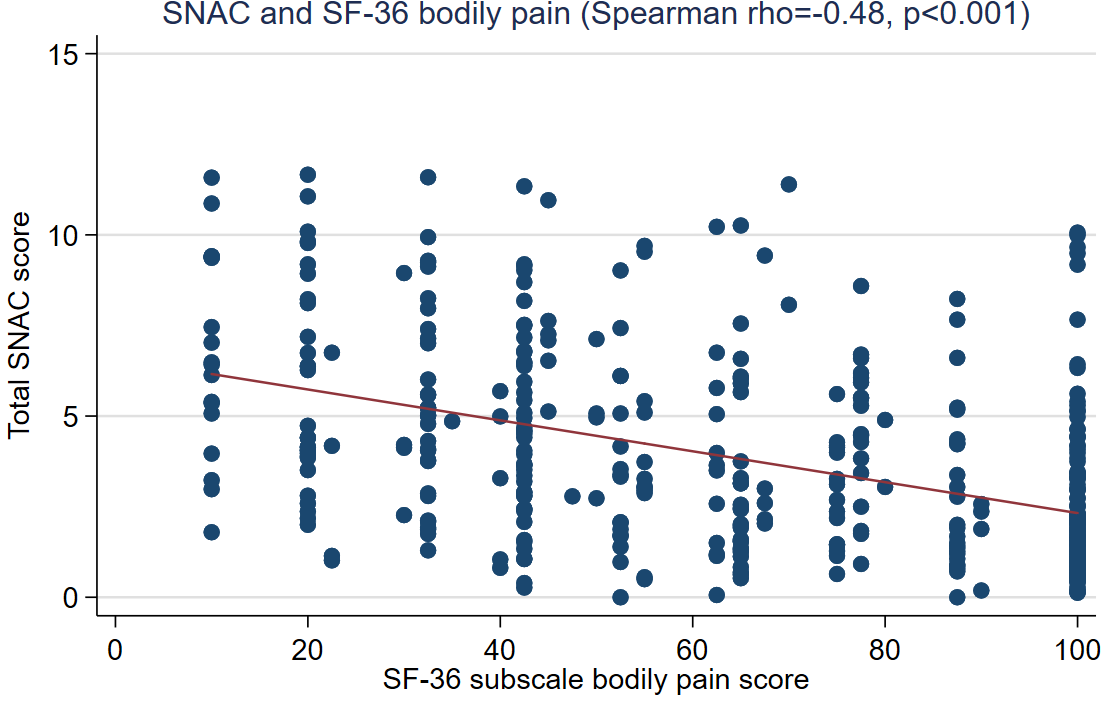 |
| 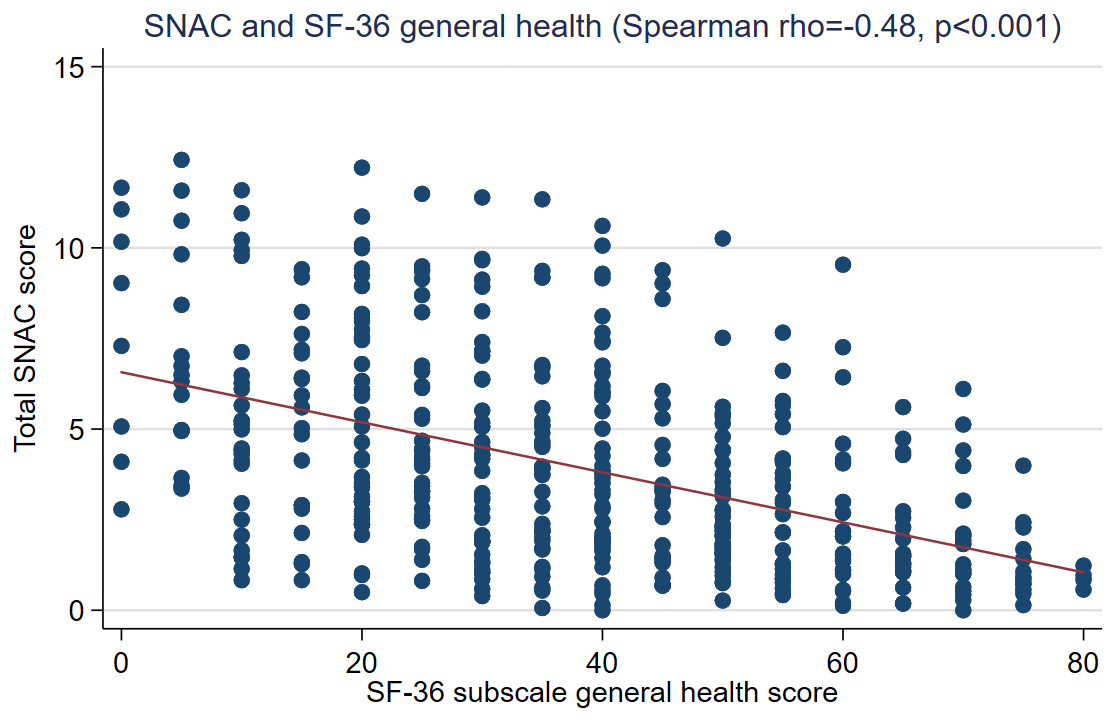 | 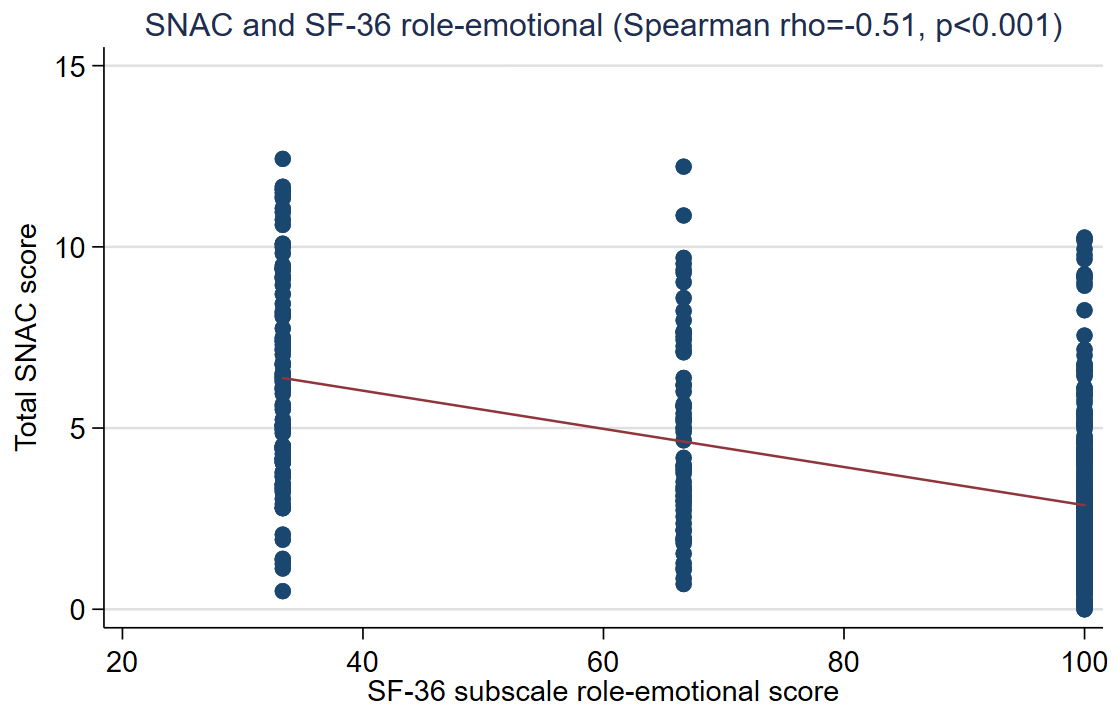 |
| 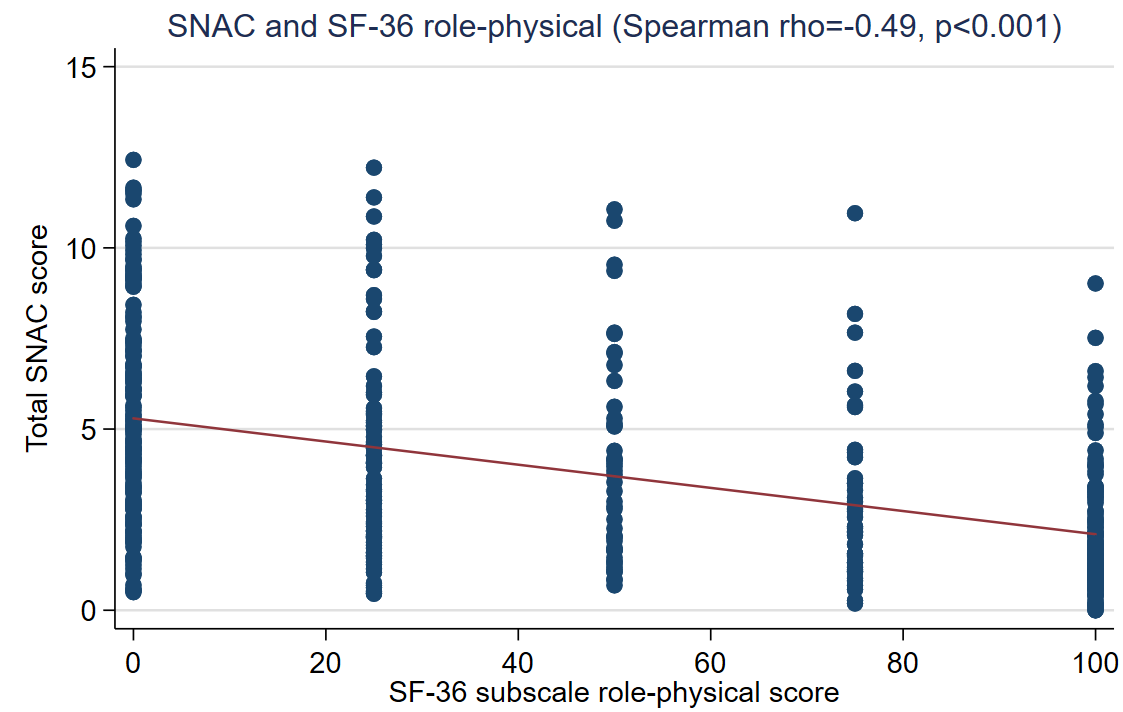 | 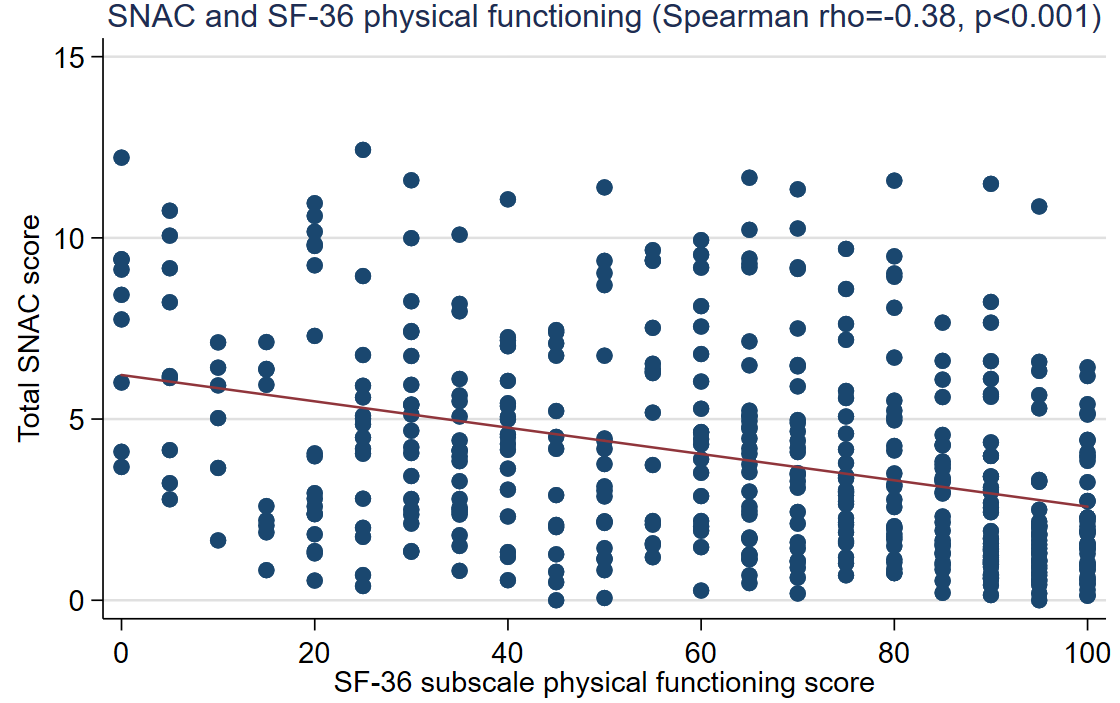 |

**Supplementary figure 1**. Scatterplot between total SNAC score and CLDQ, DT and subscales of the SF-36

Supplement: Supplementary file 1 [file get_supplementary_file.php]
